# Supplementary material for: Aging of the reaction mixture as a tool to modulate the crystallite size of UiO-66 into the low nanometer range
Source: Royal Society of Chemistry journal article supplement (doi:10.1039/c6cc02517j), 2016-01-01
Supplement: c6cc02517j1.pdf [file c6cc02517j1.pdf]

# **Aging of the Reaction Mixture as a Tool to Modulate the Crystallite Size of UiO-66 into the Low Nanometer Range**

*Marco Taddei, Kim Corinna Dümbgen, Jeroen A. van Bokhoven, Marco Ranocchiari*

**ELECTRONIC SUPPLEMENTARY  
INFORMATION**

### *Chemicals.*

ZrCl<sub>4</sub> and N,N-dimethylformamide (DMF) were purchased from Alfa Aesar. Glacial acetic acid was purchased from VWR. Terephthalic acid (H<sub>2</sub>bdc) was purchased from Sigma-Aldrich. ZrOCl<sub>2</sub>·8H<sub>2</sub>O was purchased from Merck Millipore.

### *Samples preparation:*

ZrCl<sub>4</sub> (0.35 g, 1.5 mmol) was dissolved in 15 mL of DMF inside a 20 mL glass vial. H<sub>2</sub>O and/or AcOH were then added according to Table S1 and the mixture was sonicated until complete dissolution of ZrCl<sub>4</sub>. The solution was either used fresh or aged for one or two days at room temperature prior to addition of 5 mL of a 0.3 M stock solution of H<sub>2</sub>bdc in DMF, so that in the resulting solution [Zr] = [bdc] = 0.1 M. The vial was sealed and placed in an oven at 120 °C for 24 h. The product was centrifuged, washed with DMF (20 mL) and soaked overnight in DMF (20 mL). It was successively centrifuged again, washed with acetone (20 mL), soaked overnight in acetone (20 mL) and finally dried at 70 °C under vacuum.

The relative yields were calculated considering the weight of the desolvated and dehydroxylated compounds, of formula Zr<sub>6</sub>O<sub>6</sub>(bdc)<sub>6</sub>, obtained by subtracting the weight loss at 400 °C during thermogravimetric analysis from the crude mass yield.

### *Analytical procedures.*

Powder X-ray diffraction (PXRD) patterns were collected in the 4-40° 2θ range with a Bruker D8 Advance diffractometer equipped with a LYNXEYE XE detector, using the Cu Kα radiation. The X-ray tube was operated at 40 W and 40 mA.

Nitrogen sorption isotherms at 77 K were measured on a Micromeritics Tristar II analyzer. The samples (about 30 mg) were activated overnight under vacuum at 150 °C prior to analysis. The BET numbers were calculated in the 0.010-0.070 P/P<sub>0</sub> range.

Scanning electron microscopy (SEM) images were collected on a Gemini 1530 (Zeiss) instrument at 1 kV (UiO-66).

Transmission electron microscopy (TEM) samples were prepared by dispersing the material in ethanol and putting some drops of this suspension onto the TEM grid (C-foil on Cu grid). TEM was performed on a Tecnai F30 (FEI, USA) microscope operated at 300 kV (field emission gun; SuperTwin lens with a point resolution of ca. 2 Angstrom).

Thermal gravimetric analysis (TGA) was performed on a Mettler-Toledo instrument at a 5 °C min<sup>-1</sup> heating rate up to 700 °C under 80:20 nitrogen/oxygen atmosphere.

**Table S1.** Results and characterization of all the experiments performed in this work.

| Sample        | Water<br>[eq] | AcOH<br>[eq] | Aging | Yield | FWHM<br>(111)<br>[°] | Approximate<br>Crystallite<br>Size<br>[nm] | BET Number<br>(Micropore-<br>External)<br>[m <sup>2</sup> g <sup>-1</sup> ] | Micropore<br>Volume<br>[cm <sup>3</sup> g <sup>-1</sup> ] |
|---------------|---------------|--------------|-------|-------|----------------------|--------------------------------------------|-----------------------------------------------------------------------------|-----------------------------------------------------------|
| <b>1a(3)</b>  | 24            | 30           | fresh | 90%   | 0.17                 | 100                                        | 1351 (1215-136)                                                             | 0.46                                                      |
| <b>1b(2)</b>  | 24            | 30           | 1 d   | 92%   | 0.25                 | 50                                         | 1240 (1056-184)                                                             | 0.41                                                      |
| <b>1c(1)</b>  | 24            | 30           | 2 d   | 91%   | 0.27                 | 50                                         | 1220 (1044-176)                                                             | 0.40                                                      |
| <b>2a(47)</b> | 12            | 15           | fresh | 91%   | 0.18                 | 100                                        | 1524 (1340-184)                                                             | 0.50                                                      |
| <b>2b(46)</b> | 12            | 15           | 1 d   | 86%   | 0.36                 | 25                                         | 1227 (966-261)                                                              | 0.37                                                      |
| <b>2c(59)</b> | 12            | 15           | 2 d   | 86%   | 0.61                 | 10                                         | 1181 (730-451)                                                              | 0.29                                                      |
| <b>3a(51)</b> | 24            | 15           | fresh | 95%   | 0.22                 | 75                                         | 1467 (1238-230)                                                             | 0.47                                                      |
| <b>3b(50)</b> | 24            | 15           | 1 d   | 99%   | 0.34                 | 30                                         | 1145 (910-235)                                                              | 0.35                                                      |
| <b>3c(61)</b> | 24            | 15           | 2 d   | 88%   | 0.49                 | 15                                         | 1138 (793-345)                                                              | 0.31                                                      |
| <b>4a(49)</b> | 12            | 30           | fresh | 93%   | 0.16                 | 125                                        | 1606 (1458-148)                                                             | 0.55                                                      |
| <b>4b(48)</b> | 12            | 30           | 1 d   | 90%   | 0.23                 | 75                                         | 1390 (1182-208)                                                             | 0.45                                                      |
| <b>4c(60)</b> | 12            | 30           | 2 d   | 95%   | 0.21                 | 75                                         | 1200 (1008-192)                                                             | 0.39                                                      |
| <b>5a(23)</b> | 0             | 30           | fresh | 19%   | 0.11                 | > 300                                      | 1185 (1077-108)                                                             | 0.41                                                      |
| <b>5b(22)</b> | 0             | 30           | 1 d   | 61%   | 0.11                 | > 300                                      | 1100 (985-115)                                                              | 0.38                                                      |
| <b>5c(21)</b> | 0             | 30           | 2 d   | 73%   | 0.11                 | > 300                                      | 1232 (1117-115)                                                             | 0.43                                                      |
| <b>6a(13)</b> | 24            | 0            | fresh | 93%   | 0.28                 | 50                                         | 1454 (1146-307)                                                             | 0.44                                                      |
| <b>6b(12)</b> | 24            | 0            | 1 d   | 71%   | 0.69                 | 10                                         | 999 (591-408)                                                               | 0.23                                                      |
| <b>6c(11)</b> | 24            | 0            | 2 d   | 80%   | 1.55                 | n.d.                                       | 697 (482-215)                                                               | 0.19                                                      |

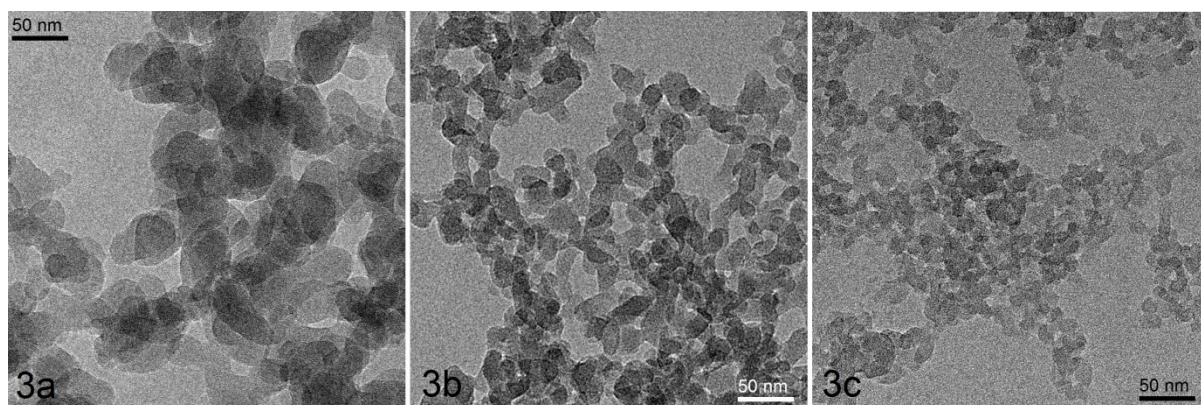

**Figure S1.** TEM micrographs of samples **3a** (left), **3b** (center) and **3c** (right).

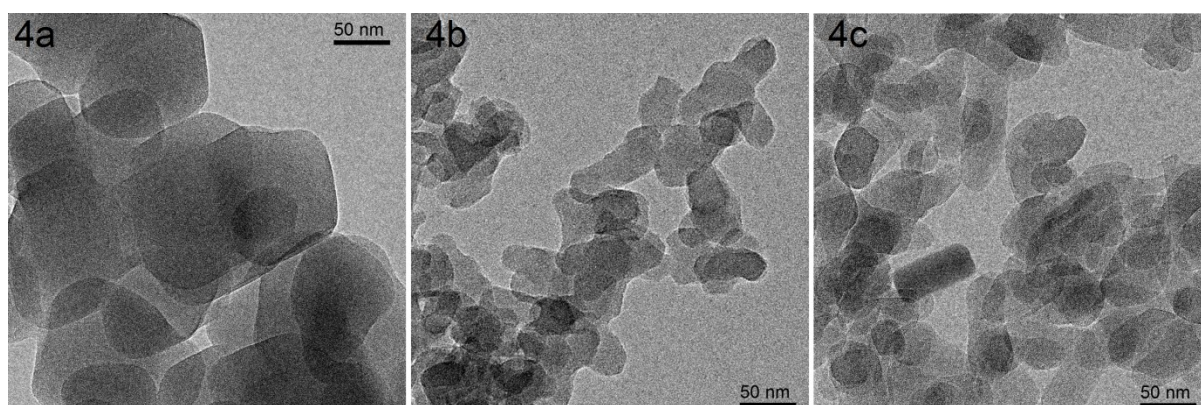

**Figure S2.** TEM micrographs of samples **4a** (left), **4b** (center) and **4c** (right).

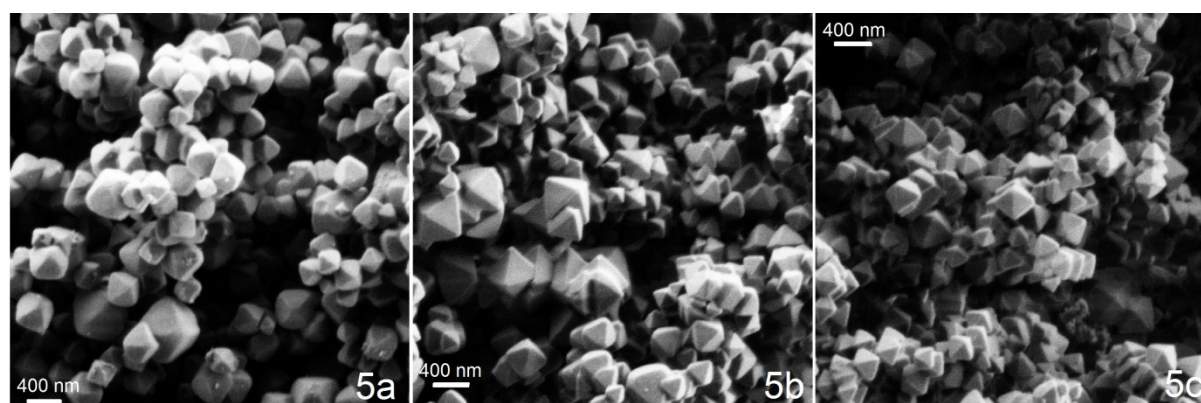

**Figure S3.** SEM micrographs of samples **5a** (left), **5b** (center) and **5c** (right).

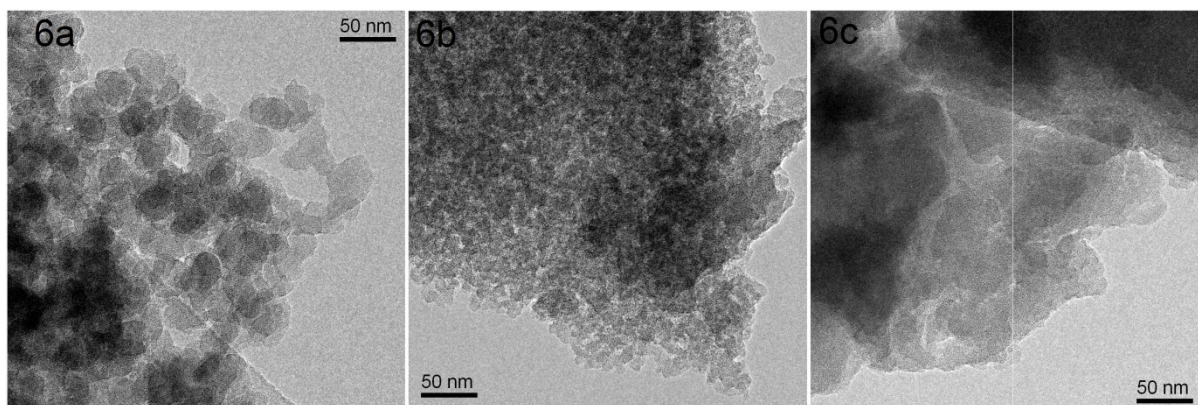

**Figure S4.** TEM micrographs of samples **6a** (left), **6b** (center) and **6c** (right).

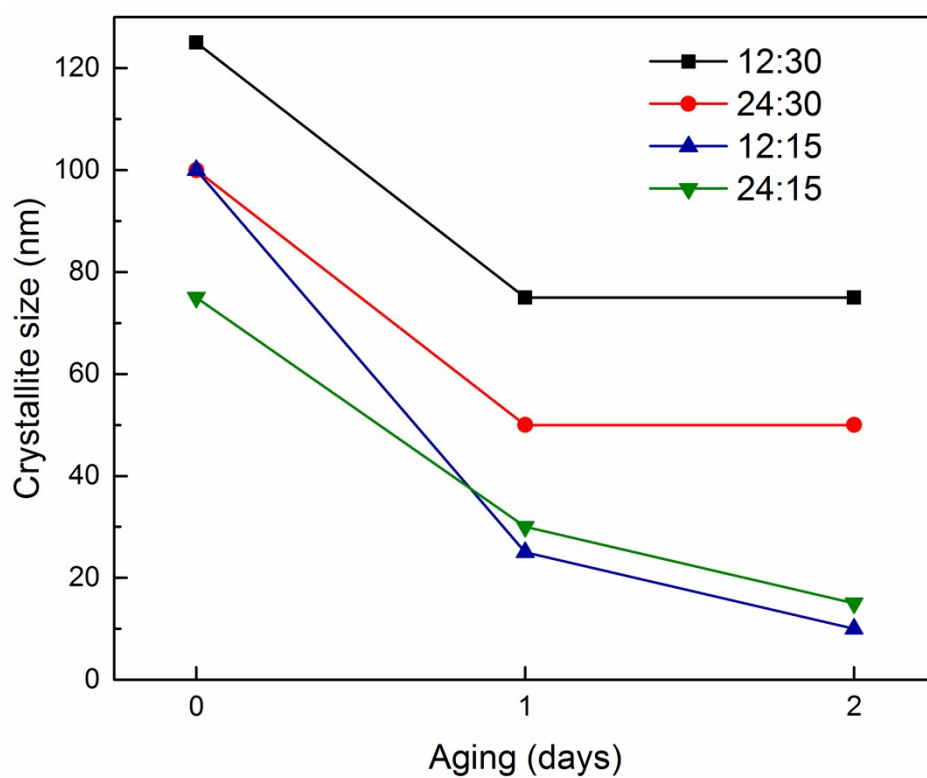

**Figure S5.** Effect of aging on crystallite size at different acetic acid/water ratios.



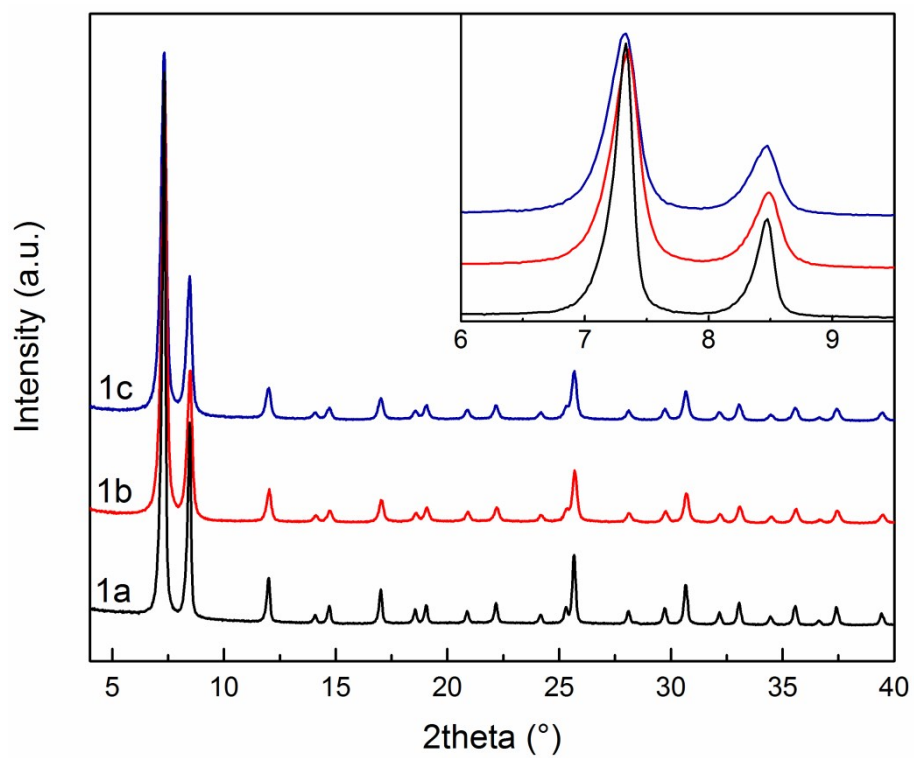

**Figure S6.** PXRD patterns of samples **1a**, **1b** and **1c**.

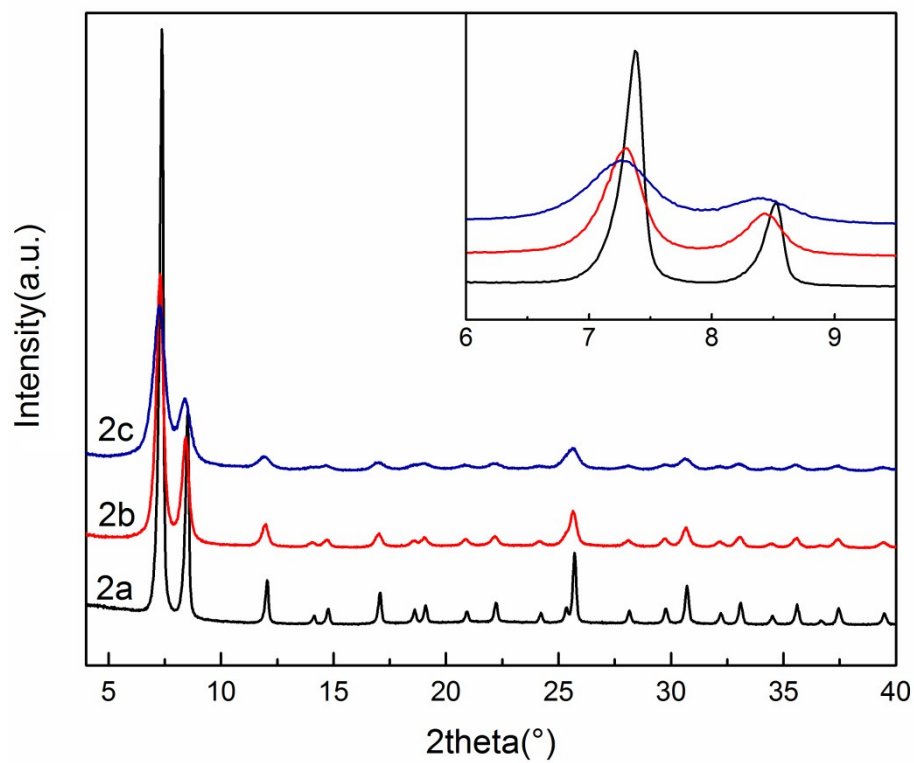

**Figure S7.** PXRD patterns of samples **2a**, **2b** and **2c**. The shift of the pattern of **2a** is due to sample displacement.

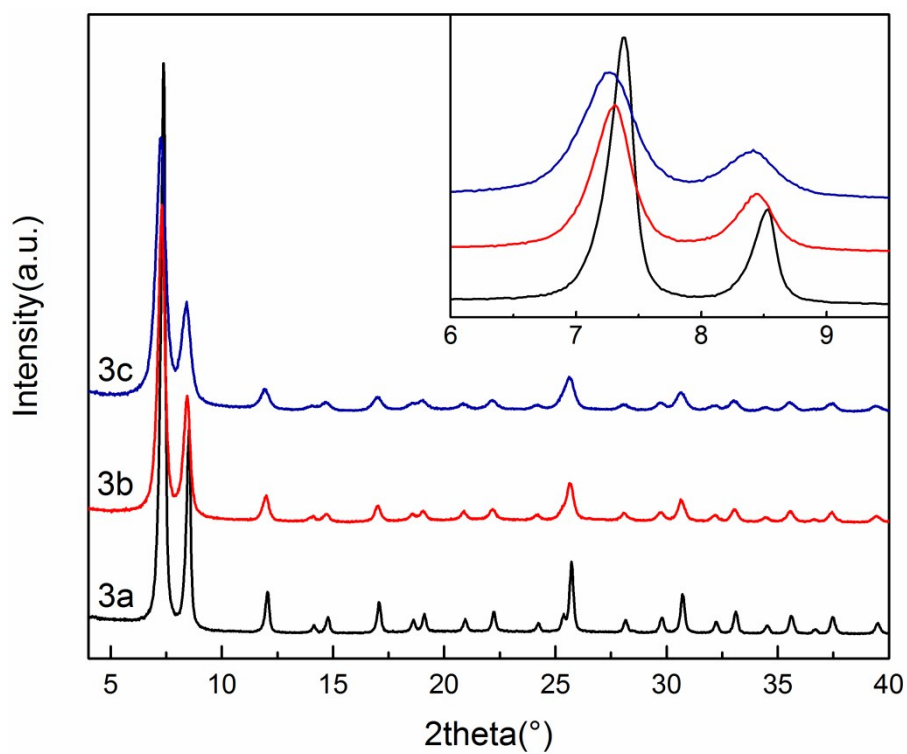

**Figure S8.** PXRD patterns of samples **3a**, **3b** and **3c**. The shift of the pattern of **3a** is due to sample displacement.

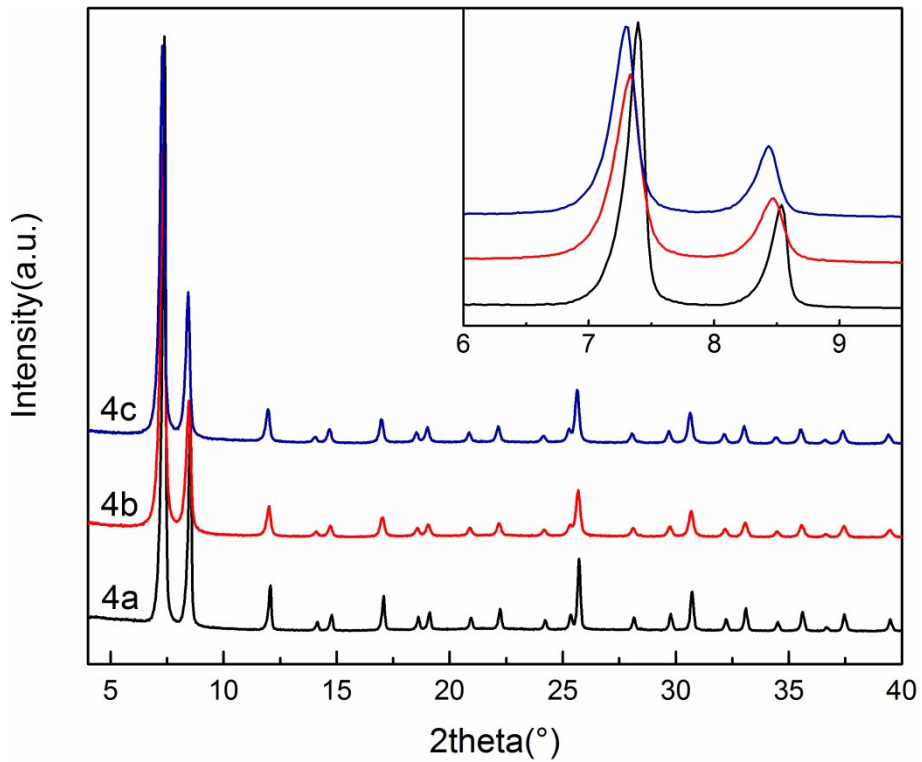

**Figure S9.** PXRD patterns of samples **4a**, **4b** and **4c**. The shift of the pattern of **4a** is due to sample displacement.



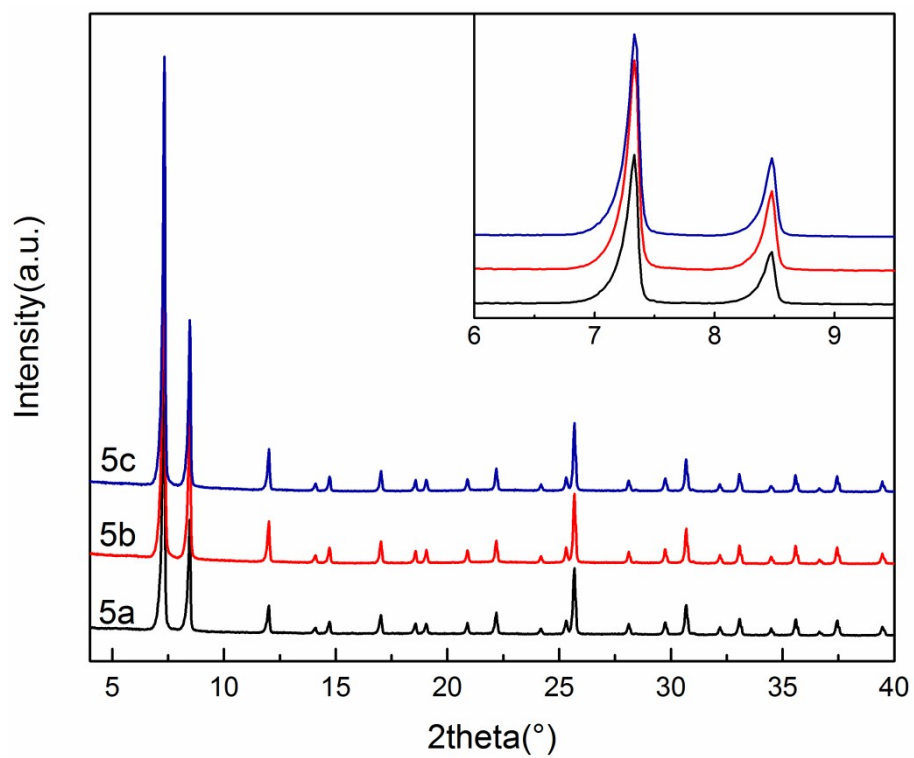

**Figure S10.** PXRD patterns of samples **5a**, **5b** and **5c**.

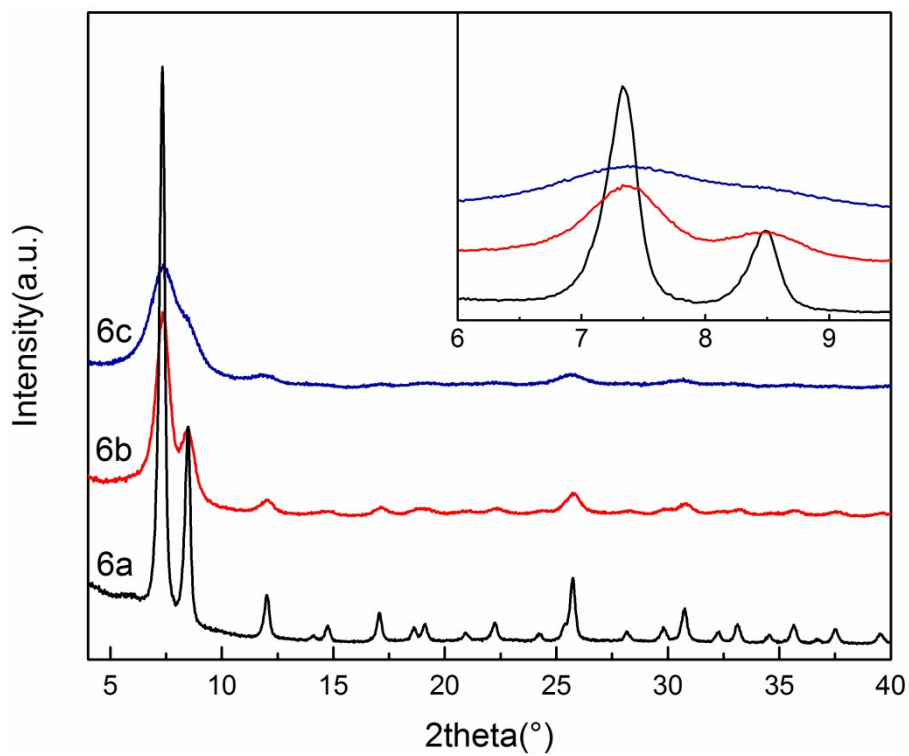

**Figure S11.** PXRD patterns of samples **6a**, **6b** and **6c**.

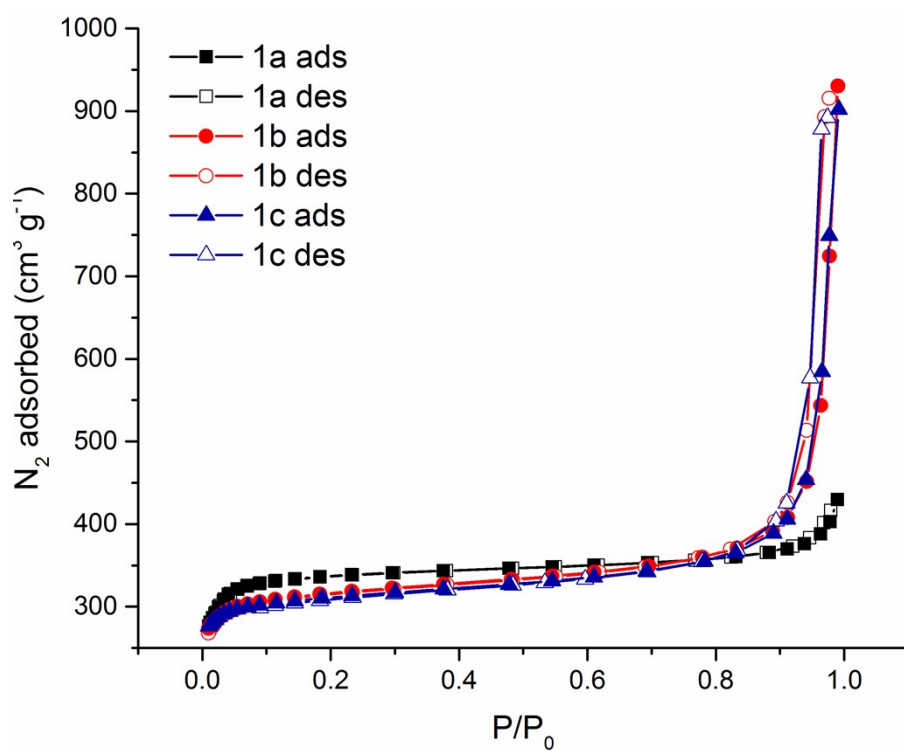

**Figure S12.** Nitrogen sorption isotherms of samples **1a**, **1b** and **1c**.

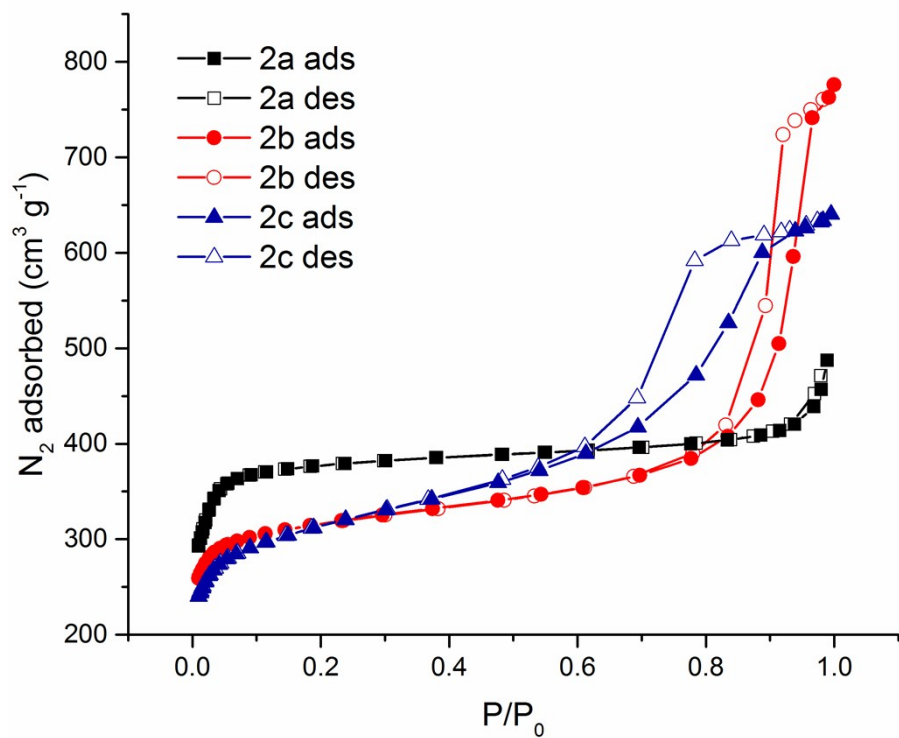

**Figure S13.** Nitrogen sorption isotherms of samples **2a**, **2b** and **2c**.

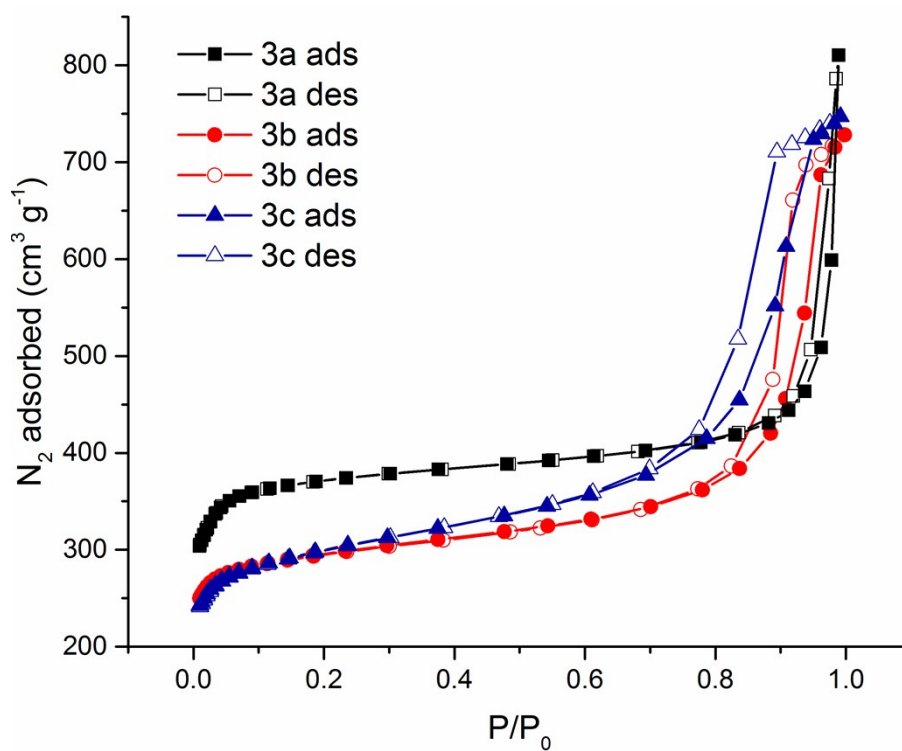

**Figure S14.** Nitrogen sorption isotherms of samples **3a**, **3b** and **3c**.

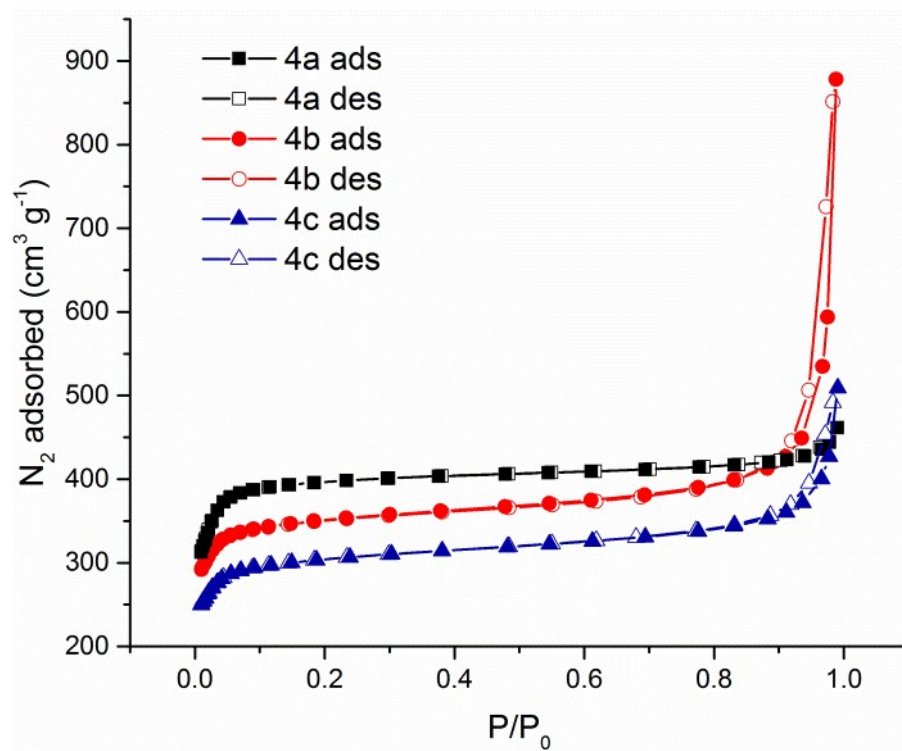

**Figure S15.** Nitrogen sorption isotherms of samples **4a**, **4b** and **4c**.

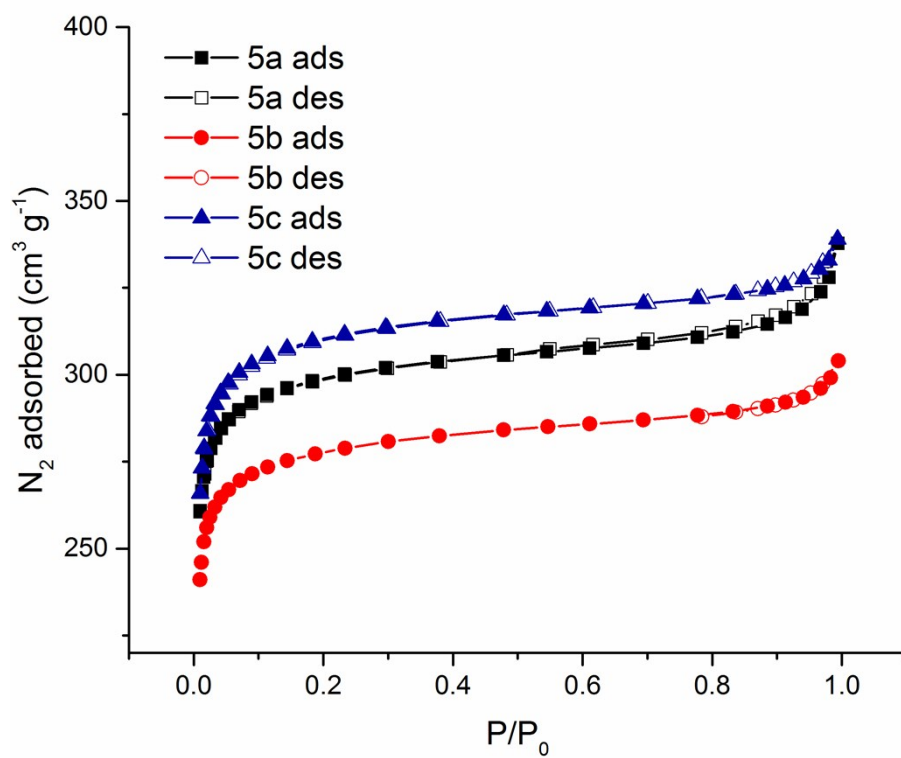

**Figure S16.** Nitrogen sorption isotherms of samples **5a**, **5b** and **5c**.

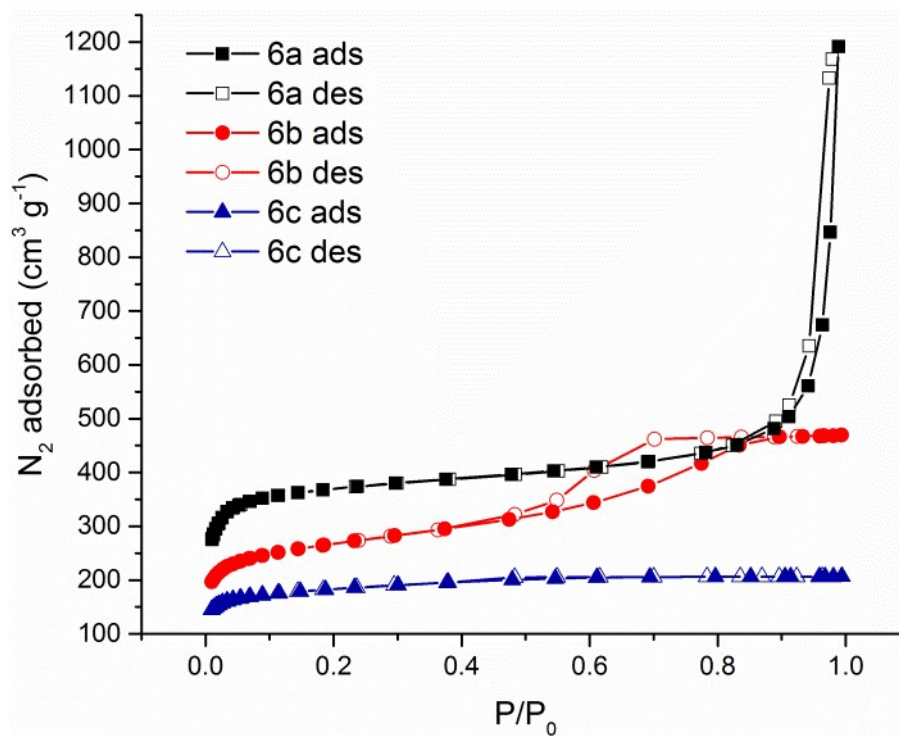

**Figure S17.** Nitrogen sorption isotherms of samples **6a**, **6b** and **6c**.

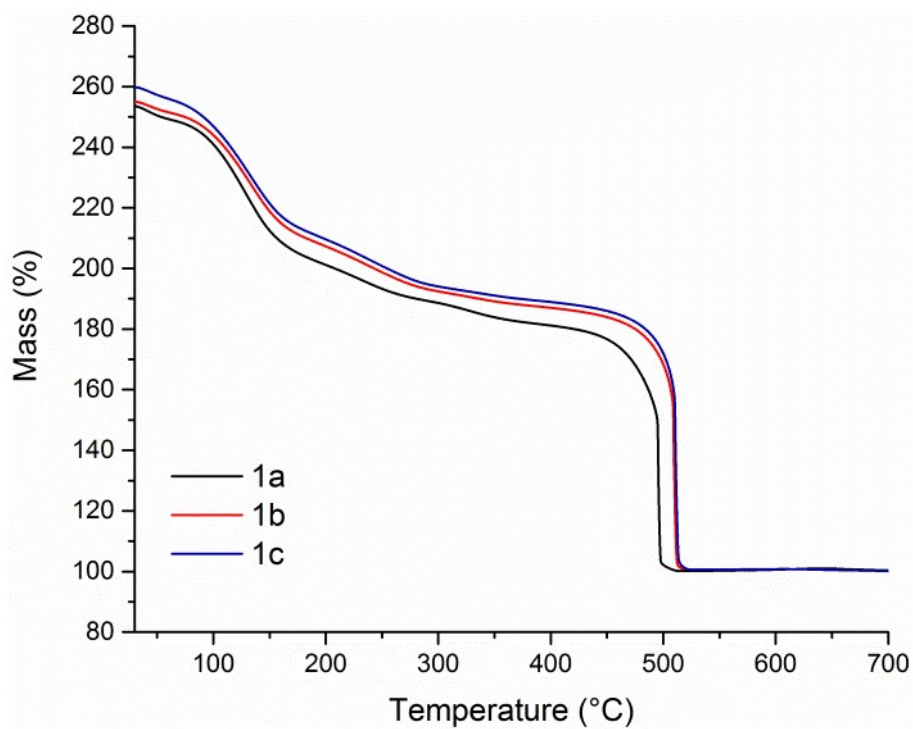

**Figure S18.** Thermogravimetric curves of samples **1a**, **1b** and **1c**.

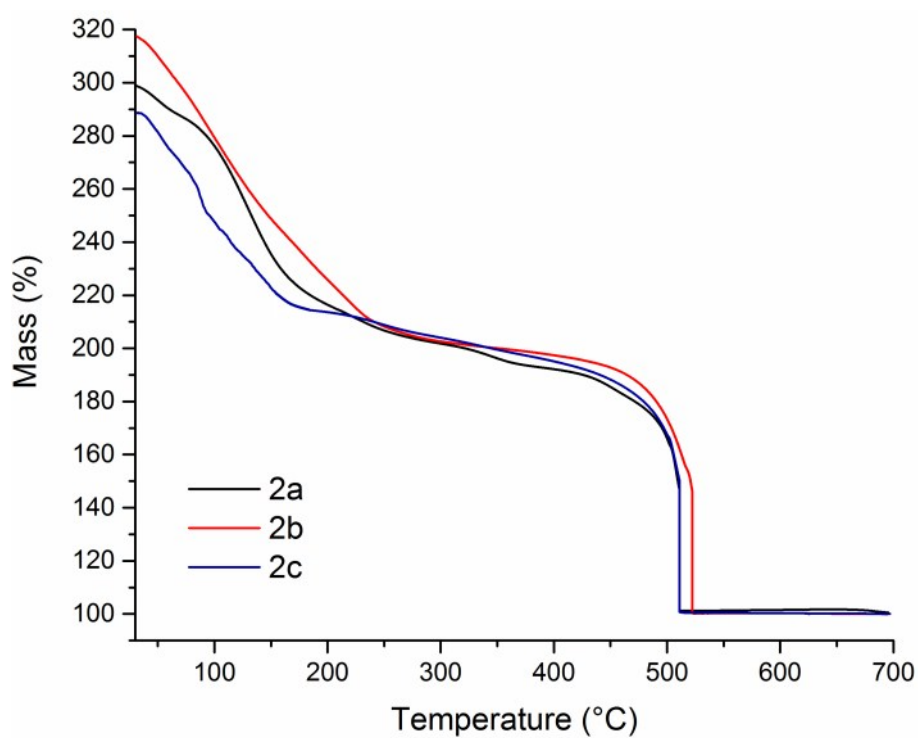

**Figure S19.** Thermogravimetric curves of samples **2a**, **2b** and **2c**.

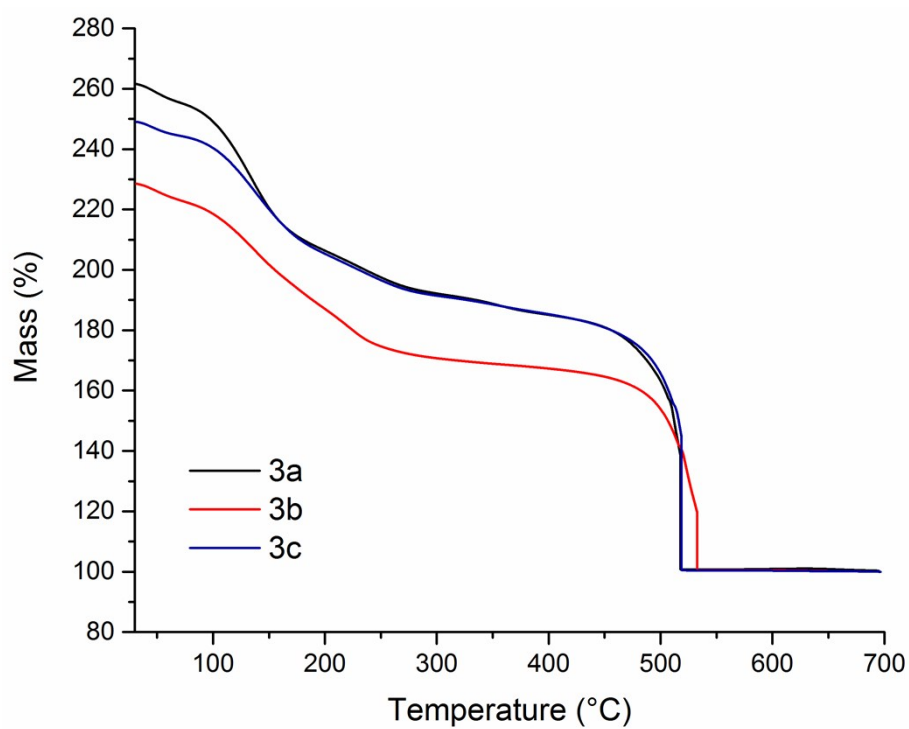

**Figure S20.** Thermogravimetric curves of samples **3a**, **3b** and **3c**.

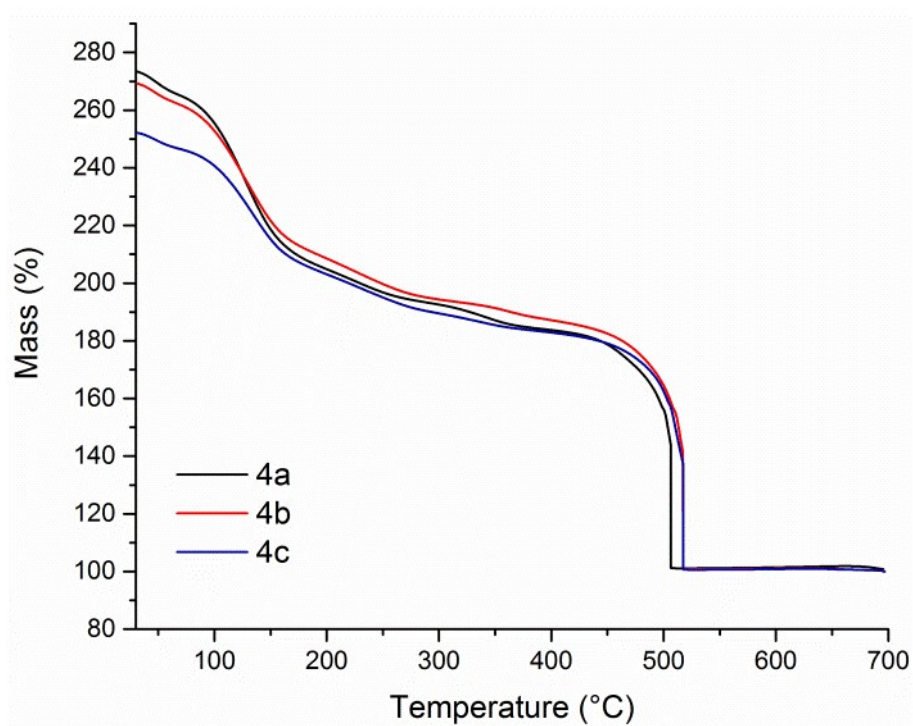

**Figure S21.** Thermogravimetric curves of samples **4a**, **4b** and **4c**.



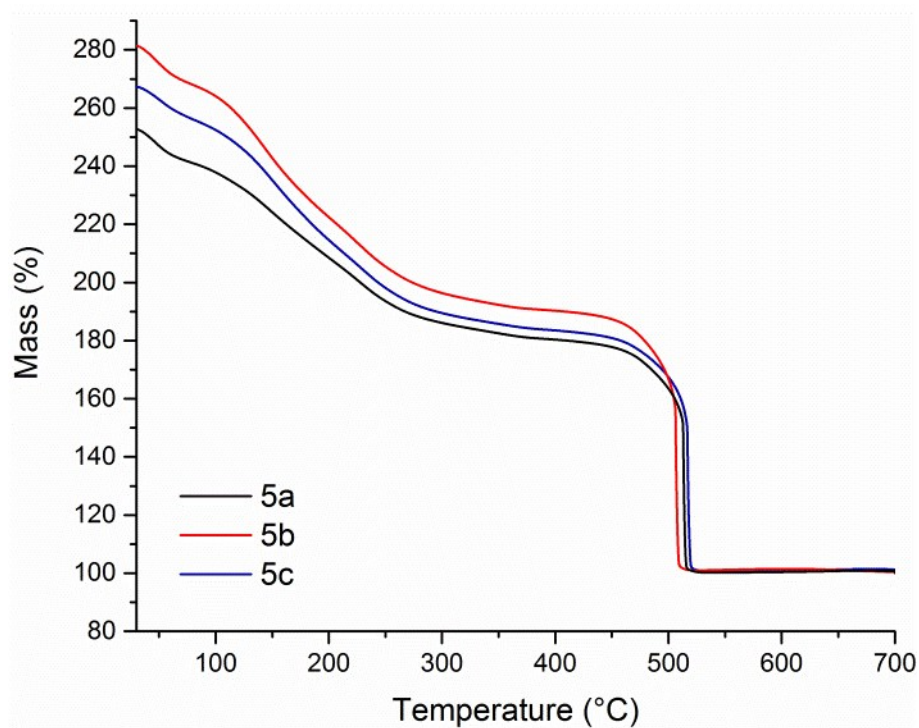

**Figure S22.** Thermogravimetric curves of samples **5a**, **5b** and **5c**.

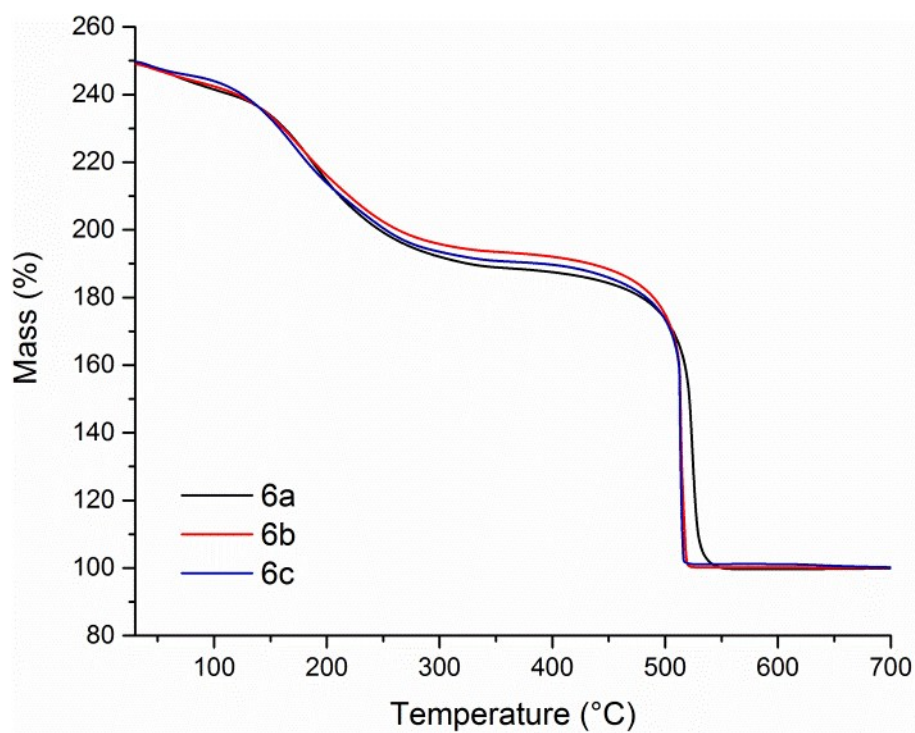

**Figure S23.** Thermogravimetric curves of samples **6a**, **6b** and **6c**.
